# Supplementary material
Source: publisher figshare collection journal article supplement (https://acs.figshare.com/ndownloader/files/4711651)
Supplement: Supplementary file 1 [file 4711651]

  
data_60519b 
  
_audit_creation_method            SHELXL-97 
_chemical_name_systematic 
; 
 ? 
; 
_chemical_name_common             ? 
_chemical_melting_point           ? 
_chemical_formula_moiety          ? 
_chemical_formula_sum 
 'C15 H18 N6 O18 Pr2' 
_chemical_formula_weight          852.17 
  
loop_ 
 _atom_type_symbol 
 _atom_type_description 
 _atom_type_scat_dispersion_real 
 _atom_type_scat_dispersion_imag 
 _atom_type_scat_source 
 'C'  'C'   0.0033   0.0016 
 'International Tables Vol C Tables 4.2.6.8 and 6.1.1.4' 
 'H'  'H'   0.0000   0.0000 
 'International Tables Vol C Tables 4.2.6.8 and 6.1.1.4' 
 'N'  'N'   0.0061   0.0033 
 'International Tables Vol C Tables 4.2.6.8 and 6.1.1.4' 
 'O'  'O'   0.0106   0.0060 
 'International Tables Vol C Tables 4.2.6.8 and 6.1.1.4' 
 'Pr'  'Pr'  -0.2180   2.8214 
 'International Tables Vol C Tables 4.2.6.8 and 6.1.1.4' 
  
_symmetry_cell_setting            Monoclinic 
_symmetry_space_group_name_H-M    Cc 
  
loop_ 
 _symmetry_equiv_pos_as_xyz 
 'x, y, z' 
 'x, -y, z+1/2' 
 'x+1/2, y+1/2, z' 
 'x+1/2, -y+1/2, z+1/2' 
  
_cell_length_a                    15.6873(13) 
_cell_length_b                    8.8288(7) 
_cell_length_c                    18.3278(15) 
_cell_angle_alpha                 90.00 
_cell_angle_beta                  98.4240(10) 
_cell_angle_gamma                 90.00 
_cell_volume                      2511.0(4) 
_cell_formula_units_Z             4 
_cell_measurement_temperature     273(2) 
_cell_measurement_reflns_used     5067 
_cell_measurement_theta_min       2.25 
_cell_measurement_theta_max       27.88 
  
_exptl_crystal_description        BLOCK 
_exptl_crystal_colour             COLORLESS 
_exptl_crystal_size_max           0.28 
_exptl_crystal_size_mid           0.22 
_exptl_crystal_size_min           0.20 
_exptl_crystal_density_meas       NONE 
_exptl_crystal_density_diffrn     2.254 
_exptl_crystal_density_method     'not measured' 
_exptl_crystal_F_000              1648 
_exptl_absorpt_coefficient_mu     3.932 
_exptl_absorpt_correction_type    MULTI-SCAN 
_exptl_absorpt_correction_T_min   0.830053 
_exptl_absorpt_correction_T_max   1.000000 
_exptl_absorpt_process_details    SADABS 
  
_exptl_special_details 
; 
 ? 
; 
  
_diffrn_ambient_temperature       273(2) 
_diffrn_radiation_wavelength      0.71073 
_diffrn_radiation_type            MoK\a 
_diffrn_radiation_source          'fine-focus sealed tube' 
_diffrn_radiation_monochromator   graphite 
_diffrn_measurement_device_type   'CCD area detector' 
_diffrn_measurement_method        'phi and omega scans' 
_diffrn_detector_area_resol_mean  ? 
_diffrn_standards_number          ? 
_diffrn_standards_interval_count  ? 
_diffrn_standards_interval_time   ? 
_diffrn_standards_decay_%         ? 
_diffrn_reflns_number             6643 
_diffrn_reflns_av_R_equivalents   0.0189 
_diffrn_reflns_av_sigmaI/netI     0.0341 
_diffrn_reflns_limit_h_min        -18 
_diffrn_reflns_limit_h_max        15 
_diffrn_reflns_limit_k_min        -10 
_diffrn_reflns_limit_k_max        10 
_diffrn_reflns_limit_l_min        -21 
_diffrn_reflns_limit_l_max        21 
_diffrn_reflns_theta_min          2.25 
_diffrn_reflns_theta_max          25.03 
_reflns_number_total              3530 
_reflns_number_gt                 3473 
_reflns_threshold_expression      >2sigma(I) 
  
_computing_data_collection        'Bruker SMART' 
_computing_cell_refinement        'Bruker SMART' 
_computing_data_reduction         'Bruker SAINT' 
_computing_structure_solution     'SHELXS-97 (Sheldrick, 1990)' 
_computing_structure_refinement   'SHELXL-97 (Sheldrick, 1997)' 
_computing_molecular_graphics     'Bruker SHELXTL' 
_computing_publication_material   'Bruker SHELXTL' 
  
_refine_special_details 
; 
 Refinement of F^2^ against ALL reflections.  The weighted R-factor wR and 
 goodness of fit S are based on F^2^, conventional R-factors R are based 
 on F, with F set to zero for negative F^2^. The threshold expression of 
 F^2^ > 2sigma(F^2^) is used only for calculating R-factors(gt) etc. and is 
 not relevant to the choice of reflections for refinement.  R-factors based 
 on F^2^ are statistically about twice as large as those based on F, and R- 
 factors based on ALL data will be even larger. 
; 
  
_refine_ls_structure_factor_coef  Fsqd 
_refine_ls_matrix_type            full 
_refine_ls_weighting_scheme       calc 
_refine_ls_weighting_details 
 'calc w=1/[\s^2^(Fo^2^)+(0.0182P)^2^+0.0000P] where P=(Fo^2^+2Fc^2^)/3' 
_atom_sites_solution_primary      direct 
_atom_sites_solution_secondary    difmap 
_atom_sites_solution_hydrogens    geom 
_refine_ls_hydrogen_treatment     mixed 
_refine_ls_extinction_method      none 
_refine_ls_extinction_coef        ? 
_refine_ls_abs_structure_details 
 'Flack H D (1983), Acta Cryst. A39, 876-881' 
_refine_ls_abs_structure_Flack    -0.003(11) 
_refine_ls_number_reflns          3530 
_refine_ls_number_parameters      370 
_refine_ls_number_restraints      2 
_refine_ls_R_factor_all           0.0179 
_refine_ls_R_factor_gt            0.0174 
_refine_ls_wR_factor_ref          0.0406 
_refine_ls_wR_factor_gt           0.0405 
_refine_ls_goodness_of_fit_ref    1.034 
_refine_ls_restrained_S_all       1.034 
_refine_ls_shift/su_max           0.001 
_refine_ls_shift/su_mean          0.000 
  
loop_ 
 _atom_site_label 
 _atom_site_type_symbol 
 _atom_site_fract_x 
 _atom_site_fract_y 
 _atom_site_fract_z 
 _atom_site_U_iso_or_equiv 
 _atom_site_adp_type 
 _atom_site_occupancy 
 _atom_site_symmetry_multiplicity 
 _atom_site_calc_flag 
 _atom_site_refinement_flags 
 _atom_site_disorder_assembly 
 _atom_site_disorder_group 
Pr1 Pr 0.453907(14) 0.04947(3) 0.142186(12) 0.01065(6) Uani 1 1 d . . . 
Pr2 Pr 0.546145(14) 0.09061(3) 0.357825(12) 0.01320(7) Uani 1 1 d . . . 
O1 O 0.4179(2) 0.1779(4) 0.26202(17) 0.0192(7) Uani 1 1 d . . . 
O2 O 0.3269(2) 0.3088(4) 0.32143(19) 0.0293(9) Uani 1 1 d . . . 
O3 O 0.0662(2) 0.4742(4) 0.06951(19) 0.0199(7) Uani 1 1 d . . . 
O4 O 0.1265(2) 0.3676(4) -0.02131(19) 0.0255(8) Uani 1 1 d . . . 
O5 O 0.3579(2) -0.0280(4) 0.03085(18) 0.0196(8) Uani 1 1 d . . . 
O6 O 0.2466(3) -0.1566(5) -0.02846(19) 0.0433(12) Uani 1 1 d . . . 
O7 O 0.0797(2) -0.3512(4) 0.22286(19) 0.0248(8) Uani 1 1 d . . . 
O8 O 0.1836(3) -0.3072(5) 0.3136(2) 0.0368(10) Uani 1 1 d . . . 
O9 O 0.4857(2) 0.2579(4) 0.06464(18) 0.0221(8) Uani 1 1 d . . . 
O10 O 0.4771(3) 0.4341(4) -0.0222(2) 0.0343(10) Uani 1 1 d . . . 
O11 O 0.4920(3) 0.8933(3) 0.26283(18) 0.0208(8) Uani 1 1 d . . . 
O12 O 0.4986(4) 0.6694(4) 0.3207(2) 0.0594(16) Uani 1 1 d . . . 
O13 O 0.4372(2) 0.1893(4) 0.43257(18) 0.0225(8) Uani 1 1 d . . . 
H13A H 0.4121 0.1141 0.4491 0.034 Uiso 1 1 d R . . 
H13B H 0.4060 0.2477 0.4029 0.034 Uiso 1 1 d R . . 
O14 O 0.5511(4) 0.3756(4) 0.3672(3) 0.0506(12) Uani 1 1 d . . . 
H14A H 0.5841 0.4130 0.3390 0.076 Uiso 1 1 d R . . 
H14B H 0.5656 0.3885 0.4133 0.076 Uiso 1 1 d R . . 
O15 O 0.6695(3) -0.1054(5) 0.3690(2) 0.0418(11) Uani 1 1 d . . . 
H15A H 0.6852 -0.0543 0.3340 0.063 Uiso 1 1 d R . . 
H15B H 0.6778 -0.2005 0.3683 0.063 Uiso 1 1 d R . . 
O16 O 0.5079(3) -0.1249(4) 0.42640(18) 0.0300(9) Uani 1 1 d . . . 
H16A H 0.5001 -0.1351 0.4710 0.045 Uiso 1 1 d R . . 
H16B H 0.5026 -0.2041 0.3997 0.045 Uiso 1 1 d R . . 
N1 N 0.3267(3) 0.2434(5) 0.1314(2) 0.0200(10) Uani 1 1 d . . . 
N2 N 0.2668(3) 0.2832(5) 0.0759(2) 0.0211(10) Uani 1 1 d . . . 
H2 H 0.2714 0.2686 0.0302 0.025 Uiso 1 1 calc R . . 
N3 N 0.3090(3) -0.0848(5) 0.1616(2) 0.0224(11) Uani 1 1 d . . . 
N4 N 0.2731(3) -0.1377(5) 0.2188(2) 0.0226(10) Uani 1 1 d . . . 
H4 H 0.2920 -0.1197 0.2644 0.027 Uiso 1 1 calc R . . 
N5 N 0.4709(3) 0.6598(4) 0.0758(2) 0.0222(9) Uani 1 1 d . . . 
H5 H 0.4628 0.6868 0.0302 0.027 Uiso 1 1 calc R . . 
N6 N 0.4732(3) 0.7551(5) 0.1320(2) 0.0206(10) Uani 1 1 d . . . 
C1 C 0.3491(3) 0.2565(5) 0.2643(3) 0.0189(11) Uani 1 1 d . . . 
C2 C 0.2949(3) 0.2845(5) 0.1923(3) 0.0186(11) Uani 1 1 d . . . 
C3 C 0.2138(4) 0.3521(6) 0.1749(3) 0.0208(12) Uani 1 1 d . . . 
H3 H 0.1786 0.3906 0.2071 0.025 Uiso 1 1 calc R . . 
C4 C 0.1984(3) 0.3484(6) 0.0988(3) 0.0183(11) Uani 1 1 d . . . 
C5 C 0.1240(3) 0.4006(5) 0.0446(3) 0.0167(11) Uani 1 1 d . . . 
C6 C 0.2889(4) -0.1074(6) 0.0281(3) 0.0231(12) Uani 1 1 d . . . 
C7 C 0.2625(3) -0.1398(6) 0.1014(2) 0.0193(10) Uani 1 1 d . . . 
C8 C 0.1938(3) -0.2272(6) 0.1189(3) 0.0235(11) Uani 1 1 d . . . 
H8 H 0.1515 -0.2763 0.0864 0.028 Uiso 1 1 calc R . . 
C9 C 0.2027(3) -0.2241(6) 0.1944(3) 0.0181(10) Uani 1 1 d . . . 
C10 C 0.1532(3) -0.2993(6) 0.2467(3) 0.0217(11) Uani 1 1 d . . . 
C11 C 0.4824(3) 0.3944(5) 0.0421(3) 0.0210(11) Uani 1 1 d . . . 
C12 C 0.4827(3) 0.5160(5) 0.0989(3) 0.0198(11) Uani 1 1 d . . . 
C13 C 0.4928(4) 0.5180(6) 0.1741(3) 0.0242(12) Uani 1 1 d . . . 
H13 H 0.5021 0.4362 0.2062 0.029 Uiso 1 1 calc R . . 
C14 C 0.4858(4) 0.6697(5) 0.1917(3) 0.0200(11) Uani 1 1 d . . . 
C15 C 0.4924(4) 0.7462(5) 0.2652(3) 0.0253(13) Uani 1 1 d . . . 
O17 O 0.8160(3) 0.1953(5) 0.4339(2) 0.0455(11) Uani 1 1 d . . . 
H17A H 0.8136 0.2643 0.4013 0.068 Uiso 1 1 d R . . 
H17B H 0.8557 0.1295 0.4344 0.068 Uiso 1 1 d R . . 
O18 O 0.2997(6) 0.9686(6) 0.3591(3) 0.113(3) Uani 1 1 d . . . 
  
loop_ 
 _atom_site_aniso_label 
 _atom_site_aniso_U_11 
 _atom_site_aniso_U_22 
 _atom_site_aniso_U_33 
 _atom_site_aniso_U_23 
 _atom_site_aniso_U_13 
 _atom_site_aniso_U_12 
Pr1 0.00946(13) 0.01115(11) 0.01124(13) 0.00000(11) 0.00126(10) -0.00047(11) 
Pr2 0.01280(14) 0.01554(12) 0.01108(13) 0.00033(11) 0.00121(10) -0.00102(11) 
O1 0.0156(19) 0.0290(18) 0.0119(17) -0.0014(14) -0.0016(14) 0.0087(15) 
O2 0.025(2) 0.043(2) 0.0199(19) -0.0018(16) 0.0042(16) 0.0159(17) 
O3 0.0138(18) 0.0244(18) 0.0233(18) 0.0017(15) 0.0083(15) 0.0065(15) 
O4 0.023(2) 0.039(2) 0.0136(18) 0.0002(16) 0.0002(15) 0.0102(17) 
O5 0.0153(19) 0.027(2) 0.0172(17) -0.0022(15) 0.0035(14) -0.0077(16) 
O6 0.037(3) 0.076(3) 0.016(2) -0.014(2) 0.0034(18) -0.032(2) 
O7 0.016(2) 0.040(2) 0.0179(18) -0.0041(15) 0.0040(15) -0.0133(16) 
O8 0.022(2) 0.067(3) 0.021(2) 0.0098(19) 0.0019(17) -0.020(2) 
O9 0.030(2) 0.0151(17) 0.0224(17) 0.0003(14) 0.0062(16) -0.0009(15) 
O10 0.066(3) 0.0207(19) 0.0173(19) 0.0011(14) 0.0088(19) 0.0006(18) 
O11 0.032(2) 0.013(2) 0.015(2) 0.0009(13) -0.0026(16) 0.0023(15) 
O12 0.140(5) 0.015(2) 0.021(2) -0.0002(17) 0.005(3) -0.002(3) 
O13 0.020(2) 0.0251(18) 0.0227(18) 0.0047(16) 0.0040(15) 0.0038(15) 
O14 0.085(4) 0.024(2) 0.039(2) 0.003(2) -0.005(2) -0.010(3) 
O15 0.036(3) 0.046(3) 0.047(3) 0.018(2) 0.016(2) 0.020(2) 
O16 0.058(3) 0.0189(18) 0.0160(17) -0.0034(14) 0.0146(18) -0.0109(18) 
N1 0.019(2) 0.026(2) 0.015(2) -0.0012(18) 0.0016(18) 0.0080(19) 
N2 0.017(2) 0.030(2) 0.015(2) -0.0001(18) -0.0011(18) 0.0109(19) 
N3 0.026(3) 0.025(2) 0.018(2) -0.0011(17) 0.007(2) -0.0081(18) 
N4 0.019(2) 0.035(3) 0.015(2) 0.0011(18) 0.0043(18) -0.0085(19) 
N5 0.039(3) 0.0111(19) 0.017(2) 0.0000(16) 0.0027(19) 0.0007(18) 
N6 0.029(3) 0.015(2) 0.019(2) -0.0017(18) 0.0063(19) 0.0030(18) 
C1 0.018(3) 0.021(3) 0.017(3) 0.001(2) 0.002(2) 0.005(2) 
C2 0.012(3) 0.024(3) 0.020(3) -0.005(2) 0.004(2) 0.003(2) 
C3 0.024(3) 0.027(3) 0.011(2) -0.001(2) 0.001(2) 0.009(2) 
C4 0.014(3) 0.023(3) 0.017(2) -0.004(2) -0.002(2) 0.002(2) 
C5 0.016(3) 0.020(3) 0.013(2) 0.001(2) 0.001(2) 0.001(2) 
C6 0.025(3) 0.029(3) 0.017(3) -0.003(2) 0.008(2) -0.004(2) 
C7 0.012(3) 0.030(3) 0.017(2) 0.001(2) 0.004(2) -0.004(2) 
C8 0.017(3) 0.031(3) 0.023(3) -0.002(2) 0.004(2) -0.013(2) 
C9 0.010(2) 0.026(3) 0.018(2) -0.001(2) 0.004(2) -0.007(2) 
C10 0.019(3) 0.025(3) 0.022(3) -0.003(2) 0.005(2) -0.006(2) 
C11 0.026(3) 0.015(2) 0.023(3) 0.003(2) 0.006(2) -0.001(2) 
C12 0.025(3) 0.015(2) 0.019(2) -0.0004(19) 0.003(2) -0.003(2) 
C13 0.039(3) 0.017(2) 0.016(2) 0.001(2) 0.000(2) 0.001(2) 
C14 0.029(3) 0.013(2) 0.017(2) -0.0011(19) 0.000(2) -0.002(2) 
C15 0.042(3) 0.013(3) 0.020(3) 0.003(2) 0.000(3) 0.001(2) 
O17 0.028(2) 0.078(3) 0.030(2) 0.003(2) 0.0012(18) -0.003(2) 
O18 0.259(10) 0.051(3) 0.025(3) -0.011(2) 0.000(4) -0.022(4) 
  
_geom_special_details 
; 
 All esds (except the esd in the dihedral angle between two l.s. planes) 
 are estimated using the full covariance matrix.  The cell esds are taken 
 into account individually in the estimation of esds in distances, angles 
 and torsion angles; correlations between esds in cell parameters are only 
 used when they are defined by crystal symmetry.  An approximate (isotropic) 
 treatment of cell esds is used for estimating esds involving l.s. planes. 
; 
  
loop_ 
 _geom_bond_atom_site_label_1 
 _geom_bond_atom_site_label_2 
 _geom_bond_distance 
 _geom_bond_site_symmetry_2 
 _geom_bond_publ_flag 
Pr1 O9 2.421(3) . ? 
Pr1 O7 2.448(3) 3 ? 
Pr1 O5 2.450(3) . ? 
Pr1 O3 2.451(3) 3_545 ? 
Pr1 O11 2.600(3) 1_545 ? 
Pr1 O1 2.606(3) . ? 
Pr1 N1 2.615(4) . ? 
Pr1 N6 2.626(4) 1_545 ? 
Pr1 N3 2.635(5) . ? 
Pr1 Pr2 4.0212(4) . ? 
Pr2 O16 2.404(3) . ? 
Pr2 O4 2.411(3) 4 ? 
Pr2 O13 2.499(3) . ? 
Pr2 O11 2.521(3) 1_545 ? 
Pr2 O14 2.522(4) . ? 
Pr2 O8 2.576(4) 3 ? 
Pr2 O15 2.582(4) . ? 
Pr2 O1 2.587(3) . ? 
Pr2 O7 2.653(3) 3 ? 
Pr2 C10 2.986(5) 3 ? 
Pr2 H15A 2.6204 . ? 
O1 C1 1.288(6) . ? 
O2 C1 1.240(6) . ? 
O3 C5 1.255(6) . ? 
O3 Pr1 2.451(3) 3_455 ? 
O4 C5 1.248(6) . ? 
O4 Pr2 2.411(3) 4_454 ? 
O5 C6 1.284(6) . ? 
O6 C6 1.225(6) . ? 
O7 C10 1.259(6) . ? 
O7 Pr1 2.448(3) 3_445 ? 
O7 Pr2 2.653(3) 3_445 ? 
O8 C10 1.250(6) . ? 
O8 Pr2 2.576(4) 3_445 ? 
O9 C11 1.273(5) . ? 
O10 C11 1.221(6) . ? 
O11 C15 1.299(5) . ? 
O11 Pr2 2.521(3) 1_565 ? 
O11 Pr1 2.600(3) 1_565 ? 
O12 C15 1.215(6) . ? 
O13 H13A 0.8500 . ? 
O13 H13B 0.8500 . ? 
O14 H14A 0.8499 . ? 
O14 H14B 0.8501 . ? 
O15 H15A 0.8500 . ? 
O15 H15B 0.8504 . ? 
O16 H16A 0.8499 . ? 
O16 H16B 0.8500 . ? 
N1 N2 1.328(5) . ? 
N1 C2 1.337(6) . ? 
N2 C4 1.339(6) . ? 
N2 H2 0.8600 . ? 
N3 C7 1.323(6) . ? 
N3 N4 1.343(6) . ? 
N4 C9 1.363(6) . ? 
N4 H4 0.8600 . ? 
N5 N6 1.327(6) . ? 
N5 C12 1.342(6) . ? 
N5 H5 0.8600 . ? 
N6 C14 1.319(6) . ? 
N6 Pr1 2.626(4) 1_565 ? 
C1 C2 1.484(7) . ? 
C2 C3 1.399(7) . ? 
C3 C4 1.379(7) . ? 
C3 H3 0.9300 . ? 
C4 C5 1.491(7) . ? 
C6 C7 1.492(7) . ? 
C7 C8 1.400(7) . ? 
C8 C9 1.371(7) . ? 
C8 H8 0.9300 . ? 
C9 C10 1.477(7) . ? 
C10 Pr2 2.986(5) 3_445 ? 
C11 C12 1.495(7) . ? 
C12 C13 1.364(7) . ? 
C13 C14 1.386(7) . ? 
C13 H13 0.9300 . ? 
C14 C15 1.497(7) . ? 
O17 H17A 0.8500 . ? 
O17 H17B 0.8500 . ? 
  
loop_ 
 _geom_angle_atom_site_label_1 
 _geom_angle_atom_site_label_2 
 _geom_angle_atom_site_label_3 
 _geom_angle 
 _geom_angle_site_symmetry_1 
 _geom_angle_site_symmetry_3 
 _geom_angle_publ_flag 
O9 Pr1 O7 82.26(11) . 3 ? 
O9 Pr1 O5 82.97(11) . . ? 
O7 Pr1 O5 161.09(11) 3 . ? 
O9 Pr1 O3 70.18(11) . 3_545 ? 
O7 Pr1 O3 81.10(12) 3 3_545 ? 
O5 Pr1 O3 82.81(11) . 3_545 ? 
O9 Pr1 O11 149.42(11) . 1_545 ? 
O7 Pr1 O11 67.17(11) 3 1_545 ? 
O5 Pr1 O11 126.65(11) . 1_545 ? 
O3 Pr1 O11 102.97(11) 3_545 1_545 ? 
O9 Pr1 O1 104.63(11) . . ? 
O7 Pr1 O1 65.81(10) 3 . ? 
O5 Pr1 O1 129.85(11) . . ? 
O3 Pr1 O1 146.90(11) 3_545 . ? 
O11 Pr1 O1 64.24(10) 1_545 . ? 
O9 Pr1 N1 71.23(13) . . ? 
O7 Pr1 N1 110.47(13) 3 . ? 
O5 Pr1 N1 75.56(12) . . ? 
O3 Pr1 N1 137.54(12) 3_545 . ? 
O11 Pr1 N1 119.30(12) 1_545 . ? 
O1 Pr1 N1 61.41(11) . . ? 
O9 Pr1 N6 132.45(12) . 1_545 ? 
O7 Pr1 N6 107.85(13) 3 1_545 ? 
O5 Pr1 N6 74.19(13) . 1_545 ? 
O3 Pr1 N6 66.05(12) 3_545 1_545 ? 
O11 Pr1 N6 61.38(11) 1_545 1_545 ? 
O1 Pr1 N6 122.13(11) . 1_545 ? 
N1 Pr1 N6 137.48(14) . 1_545 ? 
O9 Pr1 N3 132.64(13) . . ? 
O7 Pr1 N3 135.61(12) 3 . ? 
O5 Pr1 N3 63.22(12) . . ? 
O3 Pr1 N3 130.92(12) 3_545 . ? 
O11 Pr1 N3 75.02(13) 1_545 . ? 
O1 Pr1 N3 77.51(12) . . ? 
N1 Pr1 N3 68.94(14) . . ? 
N6 Pr1 N3 71.01(13) 1_545 . ? 
O9 Pr1 Pr2 115.65(8) . . ? 
O7 Pr1 Pr2 39.82(8) 3 . ? 
O5 Pr1 Pr2 158.87(8) . . ? 
O3 Pr1 Pr2 112.01(8) 3_545 . ? 
O11 Pr1 Pr2 37.57(7) 1_545 . ? 
O1 Pr1 Pr2 39.08(7) . . ? 
N1 Pr1 Pr2 100.13(9) . . ? 
N6 Pr1 Pr2 97.50(9) 1_545 . ? 
N3 Pr1 Pr2 95.80(9) . . ? 
O16 Pr2 O4 77.15(12) . 4 ? 
O16 Pr2 O13 75.32(12) . . ? 
O4 Pr2 O13 75.54(12) 4 . ? 
O16 Pr2 O11 74.30(10) . 1_545 ? 
O4 Pr2 O11 144.91(12) 4 1_545 ? 
O13 Pr2 O11 115.55(12) . 1_545 ? 
O16 Pr2 O14 139.58(14) . . ? 
O4 Pr2 O14 77.16(14) 4 . ? 
O13 Pr2 O14 68.37(16) . . ? 
O11 Pr2 O14 137.77(12) 1_545 . ? 
O16 Pr2 O8 136.57(14) . 3 ? 
O4 Pr2 O8 83.49(12) 4 3 ? 
O13 Pr2 O8 136.20(12) . 3 ? 
O11 Pr2 O8 103.76(13) 1_545 3 ? 
O14 Pr2 O8 69.70(18) . 3 ? 
O16 Pr2 O15 70.70(14) . . ? 
O4 Pr2 O15 75.23(14) 4 . ? 
O13 Pr2 O15 139.05(12) . . ? 
O11 Pr2 O15 76.37(14) 1_545 . ? 
O14 Pr2 O15 130.39(17) . . ? 
O8 Pr2 O15 66.89(14) 3 . ? 
O16 Pr2 O1 111.22(12) . . ? 
O4 Pr2 O1 145.88(12) 4 . ? 
O13 Pr2 O1 75.02(10) . . ? 
O11 Pr2 O1 65.62(10) 1_545 . ? 
O14 Pr2 O1 76.24(13) . . ? 
O8 Pr2 O1 106.61(11) 3 . ? 
O15 Pr2 O1 138.86(12) . . ? 
O16 Pr2 O7 137.67(11) . 3 ? 
O4 Pr2 O7 132.73(11) 4 3 ? 
O13 Pr2 O7 133.51(11) . 3 ? 
O11 Pr2 O7 65.34(10) 1_545 3 ? 
O14 Pr2 O7 82.08(14) . 3 ? 
O8 Pr2 O7 49.41(11) 3 3 ? 
O15 Pr2 O7 87.43(12) . 3 ? 
O1 Pr2 O7 63.27(10) . 3 ? 
O16 Pr2 C10 145.34(14) . 3 ? 
O4 Pr2 C10 107.84(13) 4 3 ? 
O13 Pr2 C10 139.34(13) . 3 ? 
O11 Pr2 C10 85.43(12) 1_545 3 ? 
O14 Pr2 C10 72.95(17) . 3 ? 
O8 Pr2 C10 24.60(13) 3 3 ? 
O15 Pr2 C10 77.44(14) . 3 ? 
O1 Pr2 C10 84.22(13) . 3 ? 
O7 Pr2 C10 24.91(12) 3 3 ? 
O16 Pr2 Pr1 111.16(8) . . ? 
O4 Pr2 Pr1 168.87(9) 4 . ? 
O13 Pr2 Pr1 113.19(8) . . ? 
O11 Pr2 Pr1 38.96(7) 1_545 . ? 
O14 Pr2 Pr1 99.22(10) . . ? 
O8 Pr2 Pr1 85.39(8) 3 . ? 
O15 Pr2 Pr1 100.08(10) . . ? 
O1 Pr2 Pr1 39.44(7) . . ? 
O7 Pr2 Pr1 36.21(7) 3 . ? 
C10 Pr2 Pr1 61.08(10) 3 . ? 
O16 Pr2 H15A 88.7 . . ? 
O4 Pr2 H15A 83.8 4 . ? 
O13 Pr2 H15A 156.2 . . ? 
O11 Pr2 H15A 75.6 1_545 . ? 
O14 Pr2 H15A 118.7 . . ? 
O8 Pr2 H15A 50.4 3 . ? 
O15 Pr2 H15A 18.8 . . ? 
O1 Pr2 H15A 128.0 . . ? 
O7 Pr2 H15A 69.8 3 . ? 
C10 Pr2 H15A 58.7 3 . ? 
Pr1 Pr2 H15A 88.9 . . ? 
C1 O1 Pr2 135.2(3) . . ? 
C1 O1 Pr1 123.2(3) . . ? 
Pr2 O1 Pr1 101.48(11) . . ? 
C5 O3 Pr1 162.5(3) . 3_455 ? 
C5 O4 Pr2 140.1(3) . 4_454 ? 
C6 O5 Pr1 126.7(3) . . ? 
C10 O7 Pr1 163.1(3) . 3_445 ? 
C10 O7 Pr2 92.5(3) . 3_445 ? 
Pr1 O7 Pr2 103.97(12) 3_445 3_445 ? 
C10 O8 Pr2 96.4(3) . 3_445 ? 
C11 O9 Pr1 155.3(3) . . ? 
C15 O11 Pr2 131.9(3) . 1_565 ? 
C15 O11 Pr1 123.9(3) . 1_565 ? 
Pr2 O11 Pr1 103.47(10) 1_565 1_565 ? 
Pr2 O13 H13A 108.2 . . ? 
Pr2 O13 H13B 103.7 . . ? 
H13A O13 H13B 116.6 . . ? 
Pr2 O14 H14A 111.2 . . ? 
Pr2 O14 H14B 101.7 . . ? 
H14A O14 H14B 117.1 . . ? 
Pr2 O15 H15A 83.2 . . ? 
Pr2 O15 H15B 140.9 . . ? 
H15A O15 H15B 116.7 . . ? 
Pr2 O16 H16A 132.0 . . ? 
Pr2 O16 H16B 111.1 . . ? 
H16A O16 H16B 116.8 . . ? 
N2 N1 C2 105.0(4) . . ? 
N2 N1 Pr1 132.7(3) . . ? 
C2 N1 Pr1 119.3(3) . . ? 
N1 N2 C4 112.5(4) . . ? 
N1 N2 H2 123.7 . . ? 
C4 N2 H2 123.7 . . ? 
C7 N3 N4 106.3(4) . . ? 
C7 N3 Pr1 115.7(3) . . ? 
N4 N3 Pr1 136.9(3) . . ? 
N3 N4 C9 110.5(4) . . ? 
N3 N4 H4 124.8 . . ? 
C9 N4 H4 124.8 . . ? 
N6 N5 C12 111.6(4) . . ? 
N6 N5 H5 124.2 . . ? 
C12 N5 H5 124.2 . . ? 
C14 N6 N5 105.4(4) . . ? 
C14 N6 Pr1 120.8(3) . 1_565 ? 
N5 N6 Pr1 133.8(3) . 1_565 ? 
O2 C1 O1 124.6(4) . . ? 
O2 C1 C2 119.6(4) . . ? 
O1 C1 C2 115.7(4) . . ? 
N1 C2 C3 111.4(4) . . ? 
N1 C2 C1 117.5(4) . . ? 
C3 C2 C1 131.1(4) . . ? 
C4 C3 C2 103.8(5) . . ? 
C4 C3 H3 128.1 . . ? 
C2 C3 H3 128.1 . . ? 
N2 C4 C3 107.3(5) . . ? 
N2 C4 C5 120.5(4) . . ? 
C3 C4 C5 132.2(5) . . ? 
O4 C5 O3 126.8(5) . . ? 
O4 C5 C4 116.2(4) . . ? 
O3 C5 C4 116.9(4) . . ? 
O6 C6 O5 125.1(5) . . ? 
O6 C6 C7 120.5(5) . . ? 
O5 C6 C7 114.4(4) . . ? 
N3 C7 C8 111.2(4) . . ? 
N3 C7 C6 119.3(4) . . ? 
C8 C7 C6 129.5(4) . . ? 
C9 C8 C7 104.5(4) . . ? 
C9 C8 H8 127.7 . . ? 
C7 C8 H8 127.7 . . ? 
N4 C9 C8 107.5(4) . . ? 
N4 C9 C10 121.0(4) . . ? 
C8 C9 C10 131.4(5) . . ? 
O8 C10 O7 121.3(5) . . ? 
O8 C10 C9 120.0(5) . . ? 
O7 C10 C9 118.7(4) . . ? 
O8 C10 Pr2 59.0(3) . 3_445 ? 
O7 C10 Pr2 62.6(3) . 3_445 ? 
C9 C10 Pr2 172.3(4) . 3_445 ? 
O10 C11 O9 125.4(4) . . ? 
O10 C11 C12 117.3(4) . . ? 
O9 C11 C12 117.3(4) . . ? 
N5 C12 C13 107.2(4) . . ? 
N5 C12 C11 118.3(4) . . ? 
C13 C12 C11 134.5(5) . . ? 
C12 C13 C14 104.3(4) . . ? 
C12 C13 H13 127.9 . . ? 
C14 C13 H13 127.9 . . ? 
N6 C14 C13 111.5(4) . . ? 
N6 C14 C15 118.1(4) . . ? 
C13 C14 C15 130.4(4) . . ? 
O12 C15 O11 125.8(4) . . ? 
O12 C15 C14 119.2(4) . . ? 
O11 C15 C14 114.9(4) . . ? 
H17A O17 H17B 117.2 . . ? 
  
loop_ 
 _geom_torsion_atom_site_label_1 
 _geom_torsion_atom_site_label_2 
 _geom_torsion_atom_site_label_3 
 _geom_torsion_atom_site_label_4 
 _geom_torsion 
 _geom_torsion_site_symmetry_1 
 _geom_torsion_site_symmetry_2 
 _geom_torsion_site_symmetry_3 
 _geom_torsion_site_symmetry_4 
 _geom_torsion_publ_flag 
O9 Pr1 Pr2 O16 179.63(15) . . . . ? 
O7 Pr1 Pr2 O16 -144.41(17) 3 . . . ? 
O5 Pr1 Pr2 O16 29.6(3) . . . . ? 
O3 Pr1 Pr2 O16 -102.59(14) 3_545 . . . ? 
O11 Pr1 Pr2 O16 -19.97(18) 1_545 . . . ? 
O1 Pr1 Pr2 O16 98.08(16) . . . . ? 
N1 Pr1 Pr2 O16 105.69(14) . . . . ? 
N6 Pr1 Pr2 O16 -35.45(14) 1_545 . . . ? 
N3 Pr1 Pr2 O16 36.10(14) . . . . ? 
O9 Pr1 Pr2 O4 -43.3(5) . . . 4 ? 
O7 Pr1 Pr2 O4 -7.3(5) 3 . . 4 ? 
O5 Pr1 Pr2 O4 166.7(6) . . . 4 ? 
O3 Pr1 Pr2 O4 34.5(5) 3_545 . . 4 ? 
O11 Pr1 Pr2 O4 117.1(5) 1_545 . . 4 ? 
O1 Pr1 Pr2 O4 -124.9(5) . . . 4 ? 
N1 Pr1 Pr2 O4 -117.2(5) . . . 4 ? 
N6 Pr1 Pr2 O4 101.6(5) 1_545 . . 4 ? 
N3 Pr1 Pr2 O4 173.2(5) . . . 4 ? 
O9 Pr1 Pr2 O13 97.09(13) . . . . ? 
O7 Pr1 Pr2 O13 133.05(16) 3 . . . ? 
O5 Pr1 Pr2 O13 -52.9(3) . . . . ? 
O3 Pr1 Pr2 O13 174.87(14) 3_545 . . . ? 
O11 Pr1 Pr2 O13 -102.50(17) 1_545 . . . ? 
O1 Pr1 Pr2 O13 15.54(15) . . . . ? 
N1 Pr1 Pr2 O13 23.16(13) . . . . ? 
N6 Pr1 Pr2 O13 -117.99(13) 1_545 . . . ? 
N3 Pr1 Pr2 O13 -46.43(13) . . . . ? 
O9 Pr1 Pr2 O11 -160.41(17) . . . 1_545 ? 
O7 Pr1 Pr2 O11 -124.44(19) 3 . . 1_545 ? 
O5 Pr1 Pr2 O11 49.6(3) . . . 1_545 ? 
O3 Pr1 Pr2 O11 -82.63(17) 3_545 . . 1_545 ? 
O1 Pr1 Pr2 O11 118.04(18) . . . 1_545 ? 
N1 Pr1 Pr2 O11 125.66(17) . . . 1_545 ? 
N6 Pr1 Pr2 O11 -15.48(17) 1_545 . . 1_545 ? 
N3 Pr1 Pr2 O11 56.07(17) . . . 1_545 ? 
O9 Pr1 Pr2 O14 26.77(17) . . . . ? 
O7 Pr1 Pr2 O14 62.7(2) 3 . . . ? 
O5 Pr1 Pr2 O14 -123.3(3) . . . . ? 
O3 Pr1 Pr2 O14 104.55(17) 3_545 . . . ? 
O11 Pr1 Pr2 O14 -172.8(2) 1_545 . . . ? 
O1 Pr1 Pr2 O14 -54.78(19) . . . . ? 
N1 Pr1 Pr2 O14 -47.17(17) . . . . ? 
N6 Pr1 Pr2 O14 171.69(18) 1_545 . . . ? 
N3 Pr1 Pr2 O14 -116.76(17) . . . . ? 
O9 Pr1 Pr2 O8 -41.78(14) . . . 3 ? 
O7 Pr1 Pr2 O8 -5.82(17) 3 . . 3 ? 
O5 Pr1 Pr2 O8 168.2(3) . . . 3 ? 
O3 Pr1 Pr2 O8 36.00(14) 3_545 . . 3 ? 
O11 Pr1 Pr2 O8 118.63(18) 1_545 . . 3 ? 
O1 Pr1 Pr2 O8 -123.33(16) . . . 3 ? 
N1 Pr1 Pr2 O8 -115.71(14) . . . 3 ? 
N6 Pr1 Pr2 O8 103.14(14) 1_545 . . 3 ? 
N3 Pr1 Pr2 O8 174.69(14) . . . 3 ? 
O9 Pr1 Pr2 O15 -107.31(14) . . . . ? 
O7 Pr1 Pr2 O15 -71.34(17) 3 . . . ? 
O5 Pr1 Pr2 O15 102.7(3) . . . . ? 
O3 Pr1 Pr2 O15 -29.52(14) 3_545 . . . ? 
O11 Pr1 Pr2 O15 53.10(18) 1_545 . . . ? 
O1 Pr1 Pr2 O15 171.14(16) . . . . ? 
N1 Pr1 Pr2 O15 178.76(16) . . . . ? 
N6 Pr1 Pr2 O15 37.62(14) 1_545 . . . ? 
N3 Pr1 Pr2 O15 109.17(14) . . . . ? 
O9 Pr1 Pr2 O1 81.55(16) . . . . ? 
O7 Pr1 Pr2 O1 117.51(17) 3 . . . ? 
O5 Pr1 Pr2 O1 -68.5(3) . . . . ? 
O3 Pr1 Pr2 O1 159.33(15) 3_545 . . . ? 
O11 Pr1 Pr2 O1 -118.04(18) 1_545 . . . ? 
N1 Pr1 Pr2 O1 7.62(15) . . . . ? 
N6 Pr1 Pr2 O1 -133.53(15) 1_545 . . . ? 
N3 Pr1 Pr2 O1 -61.98(15) . . . . ? 
O9 Pr1 Pr2 O7 -35.96(16) . . . 3 ? 
O5 Pr1 Pr2 O7 174.0(3) . . . 3 ? 
O3 Pr1 Pr2 O7 41.82(16) 3_545 . . 3 ? 
O11 Pr1 Pr2 O7 124.44(19) 1_545 . . 3 ? 
O1 Pr1 Pr2 O7 -117.51(17) . . . 3 ? 
N1 Pr1 Pr2 O7 -109.90(17) . . . 3 ? 
N6 Pr1 Pr2 O7 108.96(16) 1_545 . . 3 ? 
N3 Pr1 Pr2 O7 -179.49(16) . . . 3 ? 
O9 Pr1 Pr2 C10 -37.83(15) . . . 3 ? 
O7 Pr1 Pr2 C10 -1.87(18) 3 . . 3 ? 
O5 Pr1 Pr2 C10 172.1(3) . . . 3 ? 
O3 Pr1 Pr2 C10 39.95(15) 3_545 . . 3 ? 
O11 Pr1 Pr2 C10 122.58(18) 1_545 . . 3 ? 
O1 Pr1 Pr2 C10 -119.38(17) . . . 3 ? 
N1 Pr1 Pr2 C10 -111.76(15) . . . 3 ? 
N6 Pr1 Pr2 C10 107.09(15) 1_545 . . 3 ? 
N3 Pr1 Pr2 C10 178.65(15) . . . 3 ? 
O16 Pr2 O1 C1 79.3(4) . . . . ? 
O4 Pr2 O1 C1 -19.2(5) 4 . . . ? 
O13 Pr2 O1 C1 11.9(4) . . . . ? 
O11 Pr2 O1 C1 139.6(5) 1_545 . . . ? 
O14 Pr2 O1 C1 -59.0(4) . . . . ? 
O8 Pr2 O1 C1 -122.5(4) 3 . . . ? 
O15 Pr2 O1 C1 163.8(4) . . . . ? 
O7 Pr2 O1 C1 -146.9(5) 3 . . . ? 
C10 Pr2 O1 C1 -132.8(4) 3 . . . ? 
Pr1 Pr2 O1 C1 177.2(5) . . . . ? 
O16 Pr2 O1 Pr1 -97.89(13) . . . . ? 
O4 Pr2 O1 Pr1 163.60(15) 4 . . . ? 
O13 Pr2 O1 Pr1 -165.23(14) . . . . ? 
O11 Pr2 O1 Pr1 -37.54(11) 1_545 . . . ? 
O14 Pr2 O1 Pr1 123.88(17) . . . . ? 
O8 Pr2 O1 Pr1 60.35(15) 3 . . . ? 
O15 Pr2 O1 Pr1 -13.3(2) . . . . ? 
O7 Pr2 O1 Pr1 35.92(10) 3 . . . ? 
C10 Pr2 O1 Pr1 50.05(13) 3 . . . ? 
O9 Pr1 O1 C1 69.5(4) . . . . ? 
O7 Pr1 O1 C1 143.9(4) 3 . . . ? 
O5 Pr1 O1 C1 -23.5(4) . . . . ? 
O3 Pr1 O1 C1 145.6(3) 3_545 . . . ? 
O11 Pr1 O1 C1 -140.9(4) 1_545 . . . ? 
N1 Pr1 O1 C1 10.9(3) . . . . ? 
N6 Pr1 O1 C1 -119.5(4) 1_545 . . . ? 
N3 Pr1 O1 C1 -61.7(4) . . . . ? 
Pr2 Pr1 O1 C1 -177.6(4) . . . . ? 
O9 Pr1 O1 Pr2 -112.85(12) . . . . ? 
O7 Pr1 O1 Pr2 -38.50(11) 3 . . . ? 
O5 Pr1 O1 Pr2 154.11(11) . . . . ? 
O3 Pr1 O1 Pr2 -36.8(2) 3_545 . . . ? 
O11 Pr1 O1 Pr2 36.69(11) 1_545 . . . ? 
N1 Pr1 O1 Pr2 -171.46(17) . . . . ? 
N6 Pr1 O1 Pr2 58.08(17) 1_545 . . . ? 
N3 Pr1 O1 Pr2 115.91(14) . . . . ? 
O9 Pr1 O5 C6 -153.0(4) . . . . ? 
O7 Pr1 O5 C6 168.1(4) 3 . . . ? 
O3 Pr1 O5 C6 136.2(4) 3_545 . . . ? 
O11 Pr1 O5 C6 35.4(5) 1_545 . . . ? 
O1 Pr1 O5 C6 -49.8(4) . . . . ? 
N1 Pr1 O5 C6 -80.6(4) . . . . ? 
N6 Pr1 O5 C6 69.2(4) 1_545 . . . ? 
N3 Pr1 O5 C6 -7.2(4) . . . . ? 
Pr2 Pr1 O5 C6 0.0(6) . . . . ? 
O7 Pr1 O9 C11 -85.8(8) 3 . . . ? 
O5 Pr1 O9 C11 106.0(8) . . . . ? 
O3 Pr1 O9 C11 -169.1(8) 3_545 . . . ? 
O11 Pr1 O9 C11 -87.2(8) 1_545 . . . ? 
O1 Pr1 O9 C11 -23.4(8) . . . . ? 
N1 Pr1 O9 C11 29.0(8) . . . . ? 
N6 Pr1 O9 C11 167.0(8) 1_545 . . . ? 
N3 Pr1 O9 C11 63.0(8) . . . . ? 
Pr2 Pr1 O9 C11 -63.5(8) . . . . ? 
O9 Pr1 N1 N2 69.0(4) . . . . ? 
O7 Pr1 N1 N2 142.8(4) 3 . . . ? 
O5 Pr1 N1 N2 -18.3(4) . . . . ? 
O3 Pr1 N1 N2 43.4(5) 3_545 . . . ? 
O11 Pr1 N1 N2 -142.6(4) 1_545 . . . ? 
O1 Pr1 N1 N2 -171.7(5) . . . . ? 
N6 Pr1 N1 N2 -64.1(5) 1_545 . . . ? 
N3 Pr1 N1 N2 -84.8(4) . . . . ? 
Pr2 Pr1 N1 N2 -177.2(4) . . . . ? 
O9 Pr1 N1 C2 -134.1(4) . . . . ? 
O7 Pr1 N1 C2 -60.3(4) 3 . . . ? 
O5 Pr1 N1 C2 138.5(4) . . . . ? 
O3 Pr1 N1 C2 -159.7(3) 3_545 . . . ? 
O11 Pr1 N1 C2 14.3(4) 1_545 . . . ? 
O1 Pr1 N1 C2 -14.8(3) . . . . ? 
N6 Pr1 N1 C2 92.7(4) 1_545 . . . ? 
N3 Pr1 N1 C2 72.1(4) . . . . ? 
Pr2 Pr1 N1 C2 -20.3(4) . . . . ? 
C2 N1 N2 C4 0.3(5) . . . . ? 
Pr1 N1 N2 C4 159.5(4) . . . . ? 
O9 Pr1 N3 C7 56.2(4) . . . . ? 
O7 Pr1 N3 C7 -171.0(3) 3 . . . ? 
O5 Pr1 N3 C7 6.8(3) . . . . ? 
O3 Pr1 N3 C7 -44.6(4) 3_545 . . . ? 
O11 Pr1 N3 C7 -139.0(4) 1_545 . . . ? 
O1 Pr1 N3 C7 154.7(4) . . . . ? 
N1 Pr1 N3 C7 90.8(4) . . . . ? 
N6 Pr1 N3 C7 -74.6(4) 1_545 . . . ? 
Pr2 Pr1 N3 C7 -170.6(4) . . . . ? 
O9 Pr1 N3 N4 -137.9(4) . . . . ? 
O7 Pr1 N3 N4 -5.2(5) 3 . . . ? 
O5 Pr1 N3 N4 172.7(5) . . . . ? 
O3 Pr1 N3 N4 121.2(4) 3_545 . . . ? 
O11 Pr1 N3 N4 26.9(4) 1_545 . . . ? 
O1 Pr1 N3 N4 -39.4(4) . . . . ? 
N1 Pr1 N3 N4 -103.3(5) . . . . ? 
N6 Pr1 N3 N4 91.3(5) 1_545 . . . ? 
Pr2 Pr1 N3 N4 -4.7(5) . . . . ? 
C7 N3 N4 C9 -1.2(6) . . . . ? 
Pr1 N3 N4 C9 -167.9(4) . . . . ? 
C12 N5 N6 C14 -0.7(6) . . . . ? 
C12 N5 N6 Pr1 -178.6(3) . . . 1_565 ? 
Pr2 O1 C1 O2 -2.7(8) . . . . ? 
Pr1 O1 C1 O2 174.0(4) . . . . ? 
Pr2 O1 C1 C2 176.9(3) . . . . ? 
Pr1 O1 C1 C2 -6.4(6) . . . . ? 
N2 N1 C2 C3 -0.4(6) . . . . ? 
Pr1 N1 C2 C3 -163.0(4) . . . . ? 
N2 N1 C2 C1 -178.9(4) . . . . ? 
Pr1 N1 C2 C1 18.5(6) . . . . ? 
O2 C1 C2 N1 171.4(5) . . . . ? 
O1 C1 C2 N1 -8.2(7) . . . . ? 
O2 C1 C2 C3 -6.7(9) . . . . ? 
O1 C1 C2 C3 173.7(5) . . . . ? 
N1 C2 C3 C4 0.4(6) . . . . ? 
C1 C2 C3 C4 178.6(5) . . . . ? 
N1 N2 C4 C3 -0.1(6) . . . . ? 
N1 N2 C4 C5 -179.8(4) . . . . ? 
C2 C3 C4 N2 -0.2(6) . . . . ? 
C2 C3 C4 C5 179.5(5) . . . . ? 
Pr2 O4 C5 O3 3.1(9) 4_454 . . . ? 
Pr2 O4 C5 C4 -176.0(3) 4_454 . . . ? 
Pr1 O3 C5 O4 126.5(9) 3_455 . . . ? 
Pr1 O3 C5 C4 -54.4(13) 3_455 . . . ? 
N2 C4 C5 O4 6.2(7) . . . . ? 
C3 C4 C5 O4 -173.5(6) . . . . ? 
N2 C4 C5 O3 -173.0(5) . . . . ? 
C3 C4 C5 O3 7.3(9) . . . . ? 
Pr1 O5 C6 O6 -172.6(4) . . . . ? 
Pr1 O5 C6 C7 6.4(6) . . . . ? 
N4 N3 C7 C8 1.5(6) . . . . ? 
Pr1 N3 C7 C8 171.5(3) . . . . ? 
N4 N3 C7 C6 -177.0(4) . . . . ? 
Pr1 N3 C7 C6 -7.0(6) . . . . ? 
O6 C6 C7 N3 -179.7(5) . . . . ? 
O5 C6 C7 N3 1.2(7) . . . . ? 
O6 C6 C7 C8 2.2(9) . . . . ? 
O5 C6 C7 C8 -176.9(5) . . . . ? 
N3 C7 C8 C9 -1.2(6) . . . . ? 
C6 C7 C8 C9 177.1(5) . . . . ? 
N3 N4 C9 C8 0.5(6) . . . . ? 
N3 N4 C9 C10 178.2(4) . . . . ? 
C7 C8 C9 N4 0.4(6) . . . . ? 
C7 C8 C9 C10 -177.0(5) . . . . ? 
Pr2 O8 C10 O7 -7.2(6) 3_445 . . . ? 
Pr2 O8 C10 C9 171.1(4) 3_445 . . . ? 
Pr1 O7 C10 O8 -160.0(9) 3_445 . . . ? 
Pr2 O7 C10 O8 6.9(5) 3_445 . . . ? 
Pr1 O7 C10 C9 21.6(15) 3_445 . . . ? 
Pr2 O7 C10 C9 -171.4(4) 3_445 . . . ? 
Pr1 O7 C10 Pr2 -166.9(13) 3_445 . . 3_445 ? 
N4 C9 C10 O8 -12.8(8) . . . . ? 
C8 C9 C10 O8 164.4(6) . . . . ? 
N4 C9 C10 O7 165.6(5) . . . . ? 
C8 C9 C10 O7 -17.3(9) . . . . ? 
N4 C9 C10 Pr2 68(3) . . . 3_445 ? 
C8 C9 C10 Pr2 -115(3) . . . 3_445 ? 
Pr1 O9 C11 O10 -141.9(6) . . . . ? 
Pr1 O9 C11 C12 36.4(11) . . . . ? 
N6 N5 C12 C13 0.4(6) . . . . ? 
N6 N5 C12 C11 -179.7(4) . . . . ? 
O10 C11 C12 N5 4.9(8) . . . . ? 
O9 C11 C12 N5 -173.6(5) . . . . ? 
O10 C11 C12 C13 -175.2(6) . . . . ? 
O9 C11 C12 C13 6.3(9) . . . . ? 
N5 C12 C13 C14 0.0(6) . . . . ? 
C11 C12 C13 C14 -179.9(6) . . . . ? 
N5 N6 C14 C13 0.7(6) . . . . ? 
Pr1 N6 C14 C13 178.9(4) 1_565 . . . ? 
N5 N6 C14 C15 179.3(5) . . . . ? 
Pr1 N6 C14 C15 -2.4(7) 1_565 . . . ? 
C12 C13 C14 N6 -0.5(6) . . . . ? 
C12 C13 C14 C15 -178.9(6) . . . . ? 
Pr2 O11 C15 O12 21.6(9) 1_565 . . . ? 
Pr1 O11 C15 O12 -169.7(5) 1_565 . . . ? 
Pr2 O11 C15 C14 -157.6(4) 1_565 . . . ? 
Pr1 O11 C15 C14 11.2(7) 1_565 . . . ? 
N6 C14 C15 O12 175.3(6) . . . . ? 
C13 C14 C15 O12 -6.3(10) . . . . ? 
N6 C14 C15 O11 -5.4(8) . . . . ? 
C13 C14 C15 O11 172.9(6) . . . . ? 
  
_diffrn_measured_fraction_theta_max    0.996 
_diffrn_reflns_theta_full              25.03 
_diffrn_measured_fraction_theta_full   0.996 
_refine_diff_density_max    0.796 
_refine_diff_density_min   -0.555 
_refine_diff_density_rms    0.085 
  
